# Supplementary material
Source: publisher figshare collection journal article supplement (https://tandf.figshare.com/ndownloader/files/15326915)

## Supplementary Information

### Winter site use by Afro-Palearctic migrants in Ghana: site persistence and densities of Willow Warbler, Pied Flycatcher, Melodious Warbler and Common Redstart

Kasper Thorup, Iben Hove Sørensen, Mikkel Willemoes, Mathilde Lerche-Jørgensen, Jon Fjeldså, Anders P Tøttrup, Erik Mandrup Jacobsen, Andrew H Reeve, Robert Oteng-Appau, Augustus Asamoah and Thomas Lehmberg  
Ostrich 2019, 90(2): 173–177. <https://doi.org/10.2989/00306525.2019.1616229>

**Table S1:** Density at all sites where transect counts were carried out in 2013, 2015 and 2016. Zeros indicate that no birds of a given species were recorded. Blank fields indicate that the transect counts were not carried out at the site in the given year.

| Site                  | Species           | 2013                   |      | 2015                   |      | 2016                   |      |
|-----------------------|-------------------|------------------------|------|------------------------|------|------------------------|------|
|                       |                   | Birds ha <sup>-1</sup> | s.d. | Birds ha <sup>-1</sup> | s.d. | Birds ha <sup>-1</sup> | s.d. |
| Damongo (disturbed)   | Willow Warbler    | 0.91                   | 2.47 | 0.80                   | 2.07 | 0.50                   | 2.25 |
|                       | Pied Flycatcher   | 0.62                   | 1.19 | 0.30                   | 1.07 | 0.60                   | 1.45 |
|                       | Melodious Warbler | 0.15                   | 0.58 | 0                      |      | 0.10                   | 0.63 |
| Damongo (undisturbed) | Willow Warbler    | 0.34                   | 1.42 | 0.17                   | 0.82 | 0.13                   | 0.72 |
|                       | Pied Flycatcher   | 0.82                   | 1.25 | 0.74                   | 2.39 | 0.53                   | 1.87 |
|                       | Melodious Warbler | 0.12                   | 0.53 | 0.17                   | 0.82 | 0                      |      |
| Sacred site           | Willow Warbler    |                        |      | 0.33                   | 1.15 |                        |      |
|                       | Pied Flycatcher   |                        |      | 2.00                   | 3.19 |                        |      |
|                       | Melodious Warbler |                        |      | 0.33                   | 1.15 |                        |      |
| Daboya                | Willow Warbler    |                        |      | 0                      |      |                        |      |
|                       | Pied Flycatcher   |                        |      | 0.07                   | 0.52 |                        |      |
|                       | Melodious Warbler |                        |      | 0                      |      |                        |      |
| Tono Dam              | Willow Warbler    |                        |      | 0                      |      | 0.07                   | 0.53 |
|                       | Pied Flycatcher   |                        |      | 0                      |      | 0                      |      |
|                       | Melodious Warbler |                        |      | 0                      |      | 0                      |      |
| Navrongo              | Willow Warbler    |                        |      | 0.67                   | 1.56 | 0.33                   | 1.15 |

|                      |                   |   |      |      |
|----------------------|-------------------|---|------|------|
|                      | Pied Flycatcher   | 0 | 0.33 | 1.15 |
|                      | Melodious Warbler | 0 | 0    |      |
|                      | Willow Warbler    |   | 0.73 | 1.62 |
| Damongo Dam          | Pied Flycatcher   |   | 0.73 | 1.62 |
|                      | Melodious Warbler |   | 0.73 | 2.41 |
|                      | Willow Warbler    |   | 0.55 | 1.87 |
| Damongo NV           | Pied Flycatcher   |   | 0    |      |
|                      | Melodious Warbler |   | 0.18 | 0.85 |
|                      | Willow Warbler    |   | 0.11 | 0.66 |
| Navrongo irrigated   | Pied Flycatcher   |   | 0.11 | 0.66 |
|                      | Melodious Warbler |   | 0.65 | 2    |
|                      | Willow Warbler    |   | 0    |      |
| Navrongo s irrigated | Pied Flycatcher   |   | 0.11 | 0.65 |
|                      | Melodious Warbler |   | 0    |      |
|                      | Willow Warbler    |   | 0    |      |
| Soro river           | Pied Flycatcher   |   | 1.09 | 2.07 |
|                      | Melodious Warbler |   | 0    |      |
|                      | Willow Warbler    |   | 0    |      |
| Tono                 | Pied Flycatcher   |   | 0.33 | 1.15 |
|                      | Melodious Warbler |   | 0    |      |

**Figure S1:** Seasonal distribution during each winter of captures 10-day periods from 21 November to 31 March.

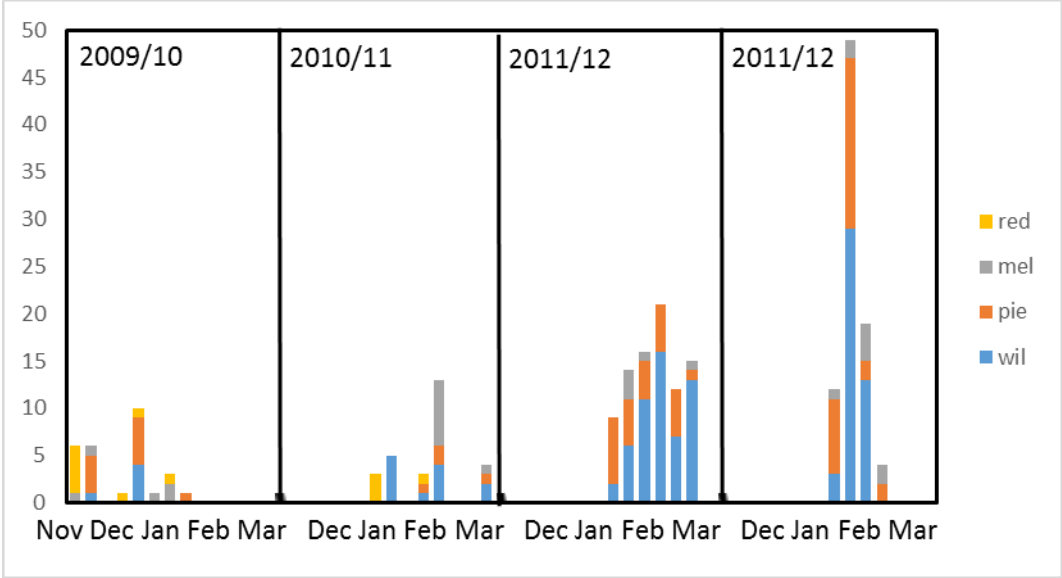

Supplement: Supplementary file 1 [file 15326915]
